# Supplementary material for: Reduced sialyl-Lewisx on salivary MUC7 from patients with burning mouth syndrome
Source: Royal Society of Chemistry journal article supplement (doi:10.1039/c9mo00061e), 2019-07-16
Supplement: c9mo00061e3.xlsx [file c9mo00061e3.xlsx]

## Sheet: MIRAGE-SamplePrep
	MIRAGE MS Guidelines
	Guidelines for reporting mass spectrometric analysis data of glycans
	Provide the information below. When more than one element has to be reported (e.g. Enzymatic or chemical treatments), please continue in the adjacent columns.
	Required fields are marked with an * (If the field is not relevant for the experiment, it can be filled in with a 'NA' -Not applicable).
General features — (a) Global descriptors
*	Date stamp	2018-02-05
*	Responsible person. Provide name,	Shikha Acharya
*	Affiliation	Institute of Odontology, University of Gothenburg
*	Stable contact information	shikha.acharya@gu.se
1. Sample Origin
	Here “sample” is defined as any carbohydrate, polysaccharide, oligosaccharide or glycoconjugate that originates from any given starting material. The starting material may be a compound, mixture or cell product used to produce the oligosaccharide sample of interest. The source and/or methods used to produce the starting sample material can vary considerably but minimum information that describes …
*	General Information	Saliva samples from BMS patients and controls
	1.1 Biologically derived material
	Biologically derived material - Recombinantly produced material
	Cell type
	Growth/harvest conditions. Other modifications.
	Biologically derived material - Biological origin of Material
	Origin (biological fluid, tissue, etc)	Saliva-Oral cavity
	Species	Human
	Describe treatments and/or storage conditions
	Glycoprotein	MUC7 (Q8TAX7)
	Biologically derived material - Purchased from commercial manufacturer
	Vendor and applicable item information
	1.2 Chemically derived material
	Synthesis steps or specify where the equivalent reaction protocol is available.
	Description of starting material
2. Sample Processing
	2.1 Sample Processing – Isolation
	Enzymatic treatments
	Enzymes used for oligosaccharide removal or modification of starting material
	Describe vendor or expression and purification procedure
	Sample material treated in-solution or immobilized? State also temperature, duration, volume, enzyme concentration
	Chemical treatments
	Define the technique for oligosaccharide release or other chemical modifications.	Release method-REDUCTIVE BETA ELIMINATION
	Reaction conditions (temperature, duration, volume and chemical concentrations).
	2.2 Sample Processing – Modification
	Enzymatic modifications
	Describe any treatments made to the isolated material.
	Enzyme concentration, supplier, biological source, incubation time and temperature.
	If novel glycosidase was used, provide information indicating the origin (i.e. species) of the enzyme.
	Chemical modifications
	Describe any treatments made to the isolated material.
	Explain the type of modification employed
	Source of materials, description of kits used, reaction conditions and detailed workflow
	2.2 Sample Processing – Purification
	Purification steps
3. Defined Sample
	Sample name

## Sheet: LC-PartOfMS
	LC-MS Settings
	For uploading of data to UniCarb-DB
	Please provide the information below.
	Required fields are marked with an * (If the field is not relevant for the experiment, it can be filled in with a 'NA' -Not applicable).
General features — (a) Global descriptors
*	Date stamp	2018-02-05
*	Responsible person. Provide name,	Chunsheng Jin
*	Affiliation	Institute of Biomedicine, Gothenburg University
*	Stable contact information	chunsheng.jin@medkem.gu.se
1. HPLC
	HPLC manufacturer	Agilent
	HPLC brand	1100 Series
	Injector
	Injector settings
2. Method run
	Temperature
*	Solvent a	10 mM Ammonium Biocarbonate
*	Solvent b	10 mM Ammonium Biocarbonate in 80% AcCN
	Other solvent
*	Flow rate	10 ul/min
	Flow gradient
	Run time
*	Phase	normal phase
3. Column
	Manufacturer
	Model
	Type of chromatography
	Type of material
	Column diameter
	Column length
	Particle size

## Sheet: MIRAGE-MS
	MIRAGE MS Guidelines
	Guidelines for reporting mass spectrometric analysis data of glycans
	Provide the information below. When more than one element has to be reported (e.g. Software or files), please continue in the adjacent columns.
	Required fields are marked with an * (If the field is not relevant for the experiment, it can be filled in with a 'NA' -Not applicable).
1. General features
	1. General features — (a) Global descriptors
*	Date stamp	2018-02-05
*	Responsible person. Provide name,	Shikha Acharya
*	Affiliation	Institute of Odontology, Gothenburg University
*	Stable contact information	shikha.acharya@gu.se
	Instrument manufacturer	Thermo Fisher
	Instrument model
	Customizations
	Ion mode	Negative
	1. General features — (b) Control and analysis software
	Software name
	Version
	Manufacturer
	Availability
	Upgrades not reflected in version number
	Switching criteria (tandem only)
	Isolation width (global, or by MS level)
	Location of ‘parameters’ file
2. Ion sources
	2. Ion sources — (a) Electrospray Ionisation (ESI)
*	Supply type (static, or fed)	fed
	Interface name
	Catalog number, vendor, and any modifications made to the standard specification.
*	Sprayer name	ESI
	Sprayer type, coating, manufacturer, model and catalog number (where available)
	Relevant voltages where appropriate (tip, cone, acceleration)
	Degree of prompt fragmentation evaluated	Yes
	Whether in-source dissociation performed	Yes
	Other parameters if discriminant for the experiment (such as nebulizing gas and pressure )
	2. Ion sources — (b) MALDI
*	Plate composition (or type)	NA
*	Matrix composition (if applicable)	NA
*	Deposition technique	NA
*	Relevant voltages where appropriate	NA
	Degree of prompt fragmentation evaluated	NA
	PSD (or LID/ISD) summary, if performed	NA
*	Operation with or without delayed extraction	NA
*	Laser type (e.g., nitrogen) and wavelength (nm)	NA
	Other laser related parameters, if discriminating for the experiment	NA
3. Ion transfer optics
	Hardware options
	3. Post-source componentry — (a) Collision cell
	Collision-Induced Dissociation (CID)
*	Gas composition	Helium
	Gas pressure
*	Collision energy CID/function	35%
	Electron Transfer Dissociation (ETD)
	Reagent gas	NA
	Pressure	NA
	Reaction time	NA
	Number of reagent atoms	NA
	Electron Capture Dissociation (ECD)
*	Emitter type	NA
	Voltage	NA
	Current	NA
	3. Post-source componentry — (b) TOF drift tube
*	Reflectron status (on, off, none)	NA
	3. Post-source componentry — (c) Ion trap
	Final MS stage achieved	NA
	3. Post-source componentry – (d) Ion mobility
*	Gas	NA
	Pressure	NA
	Instrument-specific parameters	NA
	3. Post-source componentry — (e) FT-ICR
	Peak selection	NA
	Pulse	NA
	Width	NA
	Voltage	NA
	Decay time	NA
	IR	NA
	Other parameters	NA
	3. Post-source componentry — (f) Detectors
	Detector type	NA
4. Spectrum and peak list generation and annotation
	For this section, if software other than that listed in 1b (Control and analysis software) is used to perform a task, it must be supplied in each case.
	Software name	Xcalibur
	Version	2.0.7
	Manufacturer	Thermo Finnigan
	Availability	Propietary
	4. Spectrum and peak list generation and annotation — (a) Spectrum description
	Location of source (‘raw’) files
	Name
	Format
	Identifying information for the target area
	URL
	4. Peak list generation and annotation — (b) Peak list generation
	Since several different applications may be used for the data acquisition, data post processing and spectrum annotation each used software should be recorded separately together with the information what modification has been done to the data.
	Software name
	Version
	Manufacturer
	Availability
	Customizations made to the software
	Software settings
	Data file
	Name
	Format
	URL
	Acquisition number (from the ‘raw’ file) for all acquisitions combined in the peak list, total number and whether summed or averaged.
	Parameters triggering the generation of peak lists from raw data, where appropriate
	Raw data scoring
	Smoothing; whether applied, parameters
	Background threshold, or algorithm used
	Signal-to-noise estimation and method
	Percentage peak height for centroiding; or algorithm used, if appropriate
	Retention times for all acquisitions combined in the peak list
	m/z and intensity values
	4. Peak list generation and annotation — (c) Annotation and scoring
	Since several different applications may be used for the data acquisition, data post processing and spectrum annotation each used software should be recorded separately together with the information what modification has been done to the data.
	Software name
	Version
	Manufacturer
	Availability
	Software type
	Customizations made to the software
	Software settings
	Data file generated by the software
	Name
	Format
	URI
	Database matching
	Database settings
	Database queried
	Taxonomical restrictions
	Other restrictions
	Allowed cleavages
	Mass accuracy
	Parent error
	Fragment error
	Scoring method
	Scoring value format
	Scoring algorithm
	Scoring result
	Validation
	Validation status
	Validation value format
	Validation result
	Validation level
