# Supplementary material for: Reduced sialyl-Lewisx on salivary MUC7 from patients with burning mouth syndrome
Source: Royal Society of Chemistry journal article supplement (doi:10.1039/c9mo00061e), 2019-07-16
Supplement: c9mo00061e4.xlsx [file c9mo00061e4.xlsx]

## Sheet: Sheet1
		Supplementary table 3 List of O-glycans
		Mass[a]	Composition[b]	FB41[c]	FB 48	FB 39	FB 59	FB 14	FB 35	FB 54	FB 46	FB 55	KB 10	KB 54	KB 4	KB 59	KB 37	KB 55
		384	Hex1HexNAc1	2.91[d]	5.21342	0	2.28771	1.75136	0	0.0310911	1.72574	7.35672	0.87923	0	1.86236	1.80529	1.59867	0
		513	NeuAc1HexNAc1	0	0	0.0506126	0	0	0	0	0	0	3.46428	0	0	0	0	0
		530	HexHexNAc1dHex1	6.38816	11.268	0.302761	8.38091	15.0821	26.8689	11.4806	9.29498	1.2053	3.31106	15.0799	2.97513	19.8459	0	0
		587	Hex1HexNAc2	3.29293	0.136842	0.149022	0.701266	0.272961	10.4756	0	0.264438	3.01584	2.02014	0	0.918003	0	0	0
		675	NeuAc1Hex1HexNAc1	2.00531	0	0.16129	0.832412	1.78638	0	10.0373	2.16915	2.31344	2.14166	1.05195	2.2951	1.15406	1.75761	6.7431
		675-2	NeuAc1Hex1HexNAc1	12.591	1.87442	0.126759	9.05987	9.04008	1.85191	0	7.03136	10.6763	6.09098	7.14031	4.47909	9.17057	5.7974	0
		733	Hex1HexNAc2dHex1	0.243904	0	0.21852	0	0.336346	1.46017	1.73492	0.133451	0	1.11388	2.30384	3.18372	0	0	0
		749	Hex2HexNac2	8.82793	2.64268	0.141673	6.12853	6.46583	0	2.94426	3.44108	20.2605	7.23048	1.63746	2.28135	3.11895	7.43716	2.06221
		821	NeuAc1Hex1HexNAc1dHex1	0	0	0	0	0	0	0	0	0	1.17471	0	0.684313	0	0	0
		829	Hex2HexNAc2Sul1	0.945032	0	0	0.470134	0.212889	0	0.400468	0	1.12454	0	0	0.46483	0	0.352895	0
		878	NeuAc1Hex1HexNac2	3.22982	0	0.21293	0.257688	1.24751	0	0.123459	0.537936	0.923769	0.749032	0	1.12404	0	0.582546	0
		895	Hex2HexNac2dHex1	2.94863	1.69358	0.0639534	2.19603	1.16752	0	1.1221	4.93866	0.608283	3.29814	1.75121	2.29331	1.36003	2.85188	1.41679
		895-2	Hex2HexNac2dHex1	0	0.288143	0.177587	2.03375	4.61275	0	4.87932	2.82987	2.45848	4.56943	2.66065	10.3239	2.26716	0	0
		966	NeuAc2Hex1HexNAc1	2.54626	2.41456	0	1.58475	2.53938	3.09115	1.46145	1.48468	0.784239	2.30013	2.06837	1.30348	2.44051	1.51793	1.42242
		975-1	Hex2HexNAc2dHex1Sul1	0.58178	0	0.0610056	0.646318	0	0	3.31906	0	0	0.13777	4.40277	2.44971	0	0.941439	0
		975-2	Hex2HexNAc2dHex1Sul1	0.256371	0	0.804197	0	0	0	0	0	0	0.379386	0	0	0	0	0
		1040	NeuAc1Hex2HexNAc2	5.63822	1.07734	0	6.22858	4.47993	0	4.21582	3.43982	13.7372	3.87203	3.18696	3.20208	3.65707	7.87281	3.02565
		1040-2	NeuAc1Hex2HexNAc2	1.07998	1.22587	0	6.40371	3.07879	0	4.57967	1.56035	6.74017	1.0766	2.57886	1.00941	5.92985	4.15896	2.28298
		1041	Hex2HexNAc2dHex2	0.644612	1.61678	0.137304	0	0.557635	15.7018	0.564453	2.68741	2.66777	1.53617	2.38508	3.52114	1.09607	0	0
		1098	Hex2HexNAc3dHex1	0.194896	0.127848	94.8953	0	0.591274	18.7425	0	0	0	0	0.81359	3.00342	0	0	0
		1114	Hex3HexNAc3	0.447693	0.131861	0	0.385657	0.333302	0	0.276544	5.01487	0	0.156915	0.631627	2.36331	0	1.22957	0
		1121	Hex2HexNAc2dHex2Sul1	0	0	0.299446	0	0	0	0	0	0	0	2.83774	1.10652	0	0	0
		1176	NeuAc2Hex4HexNAc4dHex2	0.784433	0.965504	0	0	0.348782	0	0.177649	0.755947	4.59297	1.59025	0	0.949665	0.464517	1.71442	2.6184
		1178	Hex2HexNAc3dHex1Sul1	0	0	0.359346	0	0.109354	0	0	0.98967	0	0	5.32126	4.48279	0	0.793279	0
		1178-2	Hex2HexNAc3dHex1Sul1	0	0	0.204982	0	0	0	0	0	0	0	0	0	0	0	0
		1186	NeuAc1Hex2HexNAc2dHex1	0.454342	5.72396	0	3.02252	8.86668	0	12.2707	9.03358	4.71489	0.746315	12.4086	13.8389	13.0232	10.9769	13.0539
		1187	Hex2HexNAc2dHex3	4.36966	1.0331	0	4.55227	7.13555	0	6.19992	3.83065	1.40168	4.35844	5.09638	0.633712	0.215697	5.34188	0
		1260	Hex3HexNAc3dHex1	0.632976	0	0	0	0	0	0	1.60699	0	0.652941	0	0.335265	0	0.855882	0.944051
		1266	NeuAc1Hex2HexNAc2dHex1Sul1	5.61261	0	0	8.85122	0	0	0	0	0	0	0	0	0	0.795586	0
		1274	Hex3HexNAc3Sul2	0	0	0	0	0	0	0	0	0	0	0	0	0	0	0
		1331	NeuAc2Hex2HexNAc2	5.03932	2.42767	0	4.30583	3.60259	0	2.3856	4.19432	5.87502	3.7916	2.73723	1.20943	3.49248	3.97003	4.81123
		1332	NeuAc1Hex2HexNAc2dHex2	0.548452	2.42424	0	1.45897	7.60056	0	3.27374	1.88774	0	7.25095	5.24771	1.63589	0.564983	0	2.97447
		1406	Hex3HexNAc3dHex2	0.24468	0.0509526	0	0	0	0	0	3.58945	0	1.17984	0	1.05315	0	0	0
		1412	NeuAc1Hex2hexNAc2dHex2Sul1	0.0616132	0	0	0	0	0	0	0	0	0	0	0	0	0	0
		1477	NeuAc2Hex2HexNAc2dHex1	13.0076	26.9248	1.63331	6.02674	3.00134	0	5.24046	2.35897	0.837649	9.75492	4.5607	4.14303	5.68509	6.25638	7.4483
		1479	Hex4HexNAc4	0.560254	5.15282	0	0.584432	0.110394	0	0	1.70732	0	0.171144	0.255653	1.0333	0	0	0.578466
		1551	NeuAc1Hex3HexNAc3dHex1	0.393948	0.116226	0	0	0	0	0	0.692246	0	0	0	0.109438	0	0	0
		1557	NeuAc2Hex2HexNAc2dHex1Sul1	0	0	0	0	0	0	0	0	0	0	0	0	0	0	0
		1625	Hex4HexNAc4dHex1	0.250996	0	0	0	0	0	0	0.513764	0	0.102289	0	0	0	0	0
		1696	NeuAc2Hex3HexNAc3	0	0	0	0	0	0	0	0	0	0	0	0	0	0	0
		1698	Hex3HexNAc3dHex4	0.126329	0.0939838	0	0	0	0	0	0	0	0	0	0	0	0	0
		1770	NeuAc1Hex4HexNAc4	0	0	0	0	0	0	0	0	0	0	0	0	0	0	0
		1771	Hex4HexNAc4dHex2	0	0	0	0	0	0	0	0	0	0	0	0	0	0	0
		1842	NeuAc2Hex3HexNAc3dHex1	0	0	0	0	0	0	0	0	0	0	0	0	0	0	0
		1988	NeuAc2Hex3HexNAc3dHex2	0	0	0	0	0	0	0	0	0	0	0	0	0	0	0
		1989	NeuAc1Hex3HexNAc3dhex4	2.62108	9.50876	0	2.96195	4.01402	0	8.9918	9.20659	0	8.90326	5.10482	7.96249	7.42778	5.23011	0
		1916	NeuAc2Hex3HexNAc3dHex1	0.210992	0	0	0	0	0	0	0	0	0	0	0	0	0	0
		2061	NeuAc2Hex4HexNAc4	3.10823	1.86487	0	4.18573	3.36951	0	1.65157	0	6.1497	0.663018	0	0	0.77175	5.98645	7.41183
		1103	NeuAc2Hex4HexNAc4dHex1	1.15314	0.198829	0	1.79332	0.824701	0	1.10901	2.40222	0.499206	1.23755	0.877239	2.07188	2.20256	2.09004	3.78603
		1103-2	NeuAc2Hex4HexNAc4dHex1	0	0.754361	0	2.63226	0.319392	0	2.34862	2.6135	0	0.799505	0	3.67323	3.27586	6.86701	14.6545
		2498	NeuAc2Hex4HexnaC4dHex3	3.74389	3.7552	0	7.34549	4.0212	0	5.16144	4.79494	2.0563	5.18298	4.96476	3.7024	5.57136	8.71794	10.7749
		1322	NeuAC4Hex4HexNAc4	1.30834	4.22598	0	4.68196	2.27724	21.8081	3.1597	3.2683	0	4.78048	2.89537	2.32124	4.94312	4.30522	8.79592
		2791	NeuAc3Hex4HexNAc4dHex3	0.991325	5.06744	0	0	0.842695	0	0.859171	0	0	3.33249	0	0	0.516072	0	5.19478
		[a]	mass of calculated [M-H] ions with reducing end
		[b]	Hex, hexose; HexNAc, N-acetylhexosamine; dHex, Fucose; NeuAc, N-acetylneuraminic acid;NeuGc, N-acetyl glycolylneuraminic acid; Sul, sulphate
		[c]	Saliva sample codes; FB=patients with BMS ; KB= Controls
		[d]	Relative intensity in percentage (%) of total peak intensity of each sample

## Sheet: Sheet2
			Raw files
		BMS	FB41	SK_161108 F41MUC7
		BMS	FB 48	SK_161108 F41MUC7
		BMS	FB 39	SK_161109 F41MUC7
		BMS	FB 59	SK_161109 F41MUC7
		BMS	FB 14	SK_161109 F41MUC7
		BMS	FB 35	SK_161108 F35MUC7_161109141912
		BMS	FB 54	SK_161109 F54MUC7
		BMS	FB 46	SK_161109 F46MUC7
		BMS	FB 55	SK_161109 F55MUC7
		Control	KB 10	SK_161109 KB10MUC7
		Control	KB 54	SK_161109 KB54MUC7
		Control	KB 4	SK_161109 KB4MUC7
		Control	KB 59	SK_161108 KB59MUC7
		Control	KB 37	SK_161109 KB37MUC7
		Control	KB 55	SK_161108 KB55MUC7
